# Supplementary material for: Scrapie-Responsive Gene 1 Promotes Chondrogenic Differentiation of Umbilical Cord Mesenchymal Stem Cells via Wnt5a
Source: Hindawi journal article supplement (doi:10.1155/2022/9124277), 2022-01-27
Supplement: f1 [file 9124277.f1.pdf]

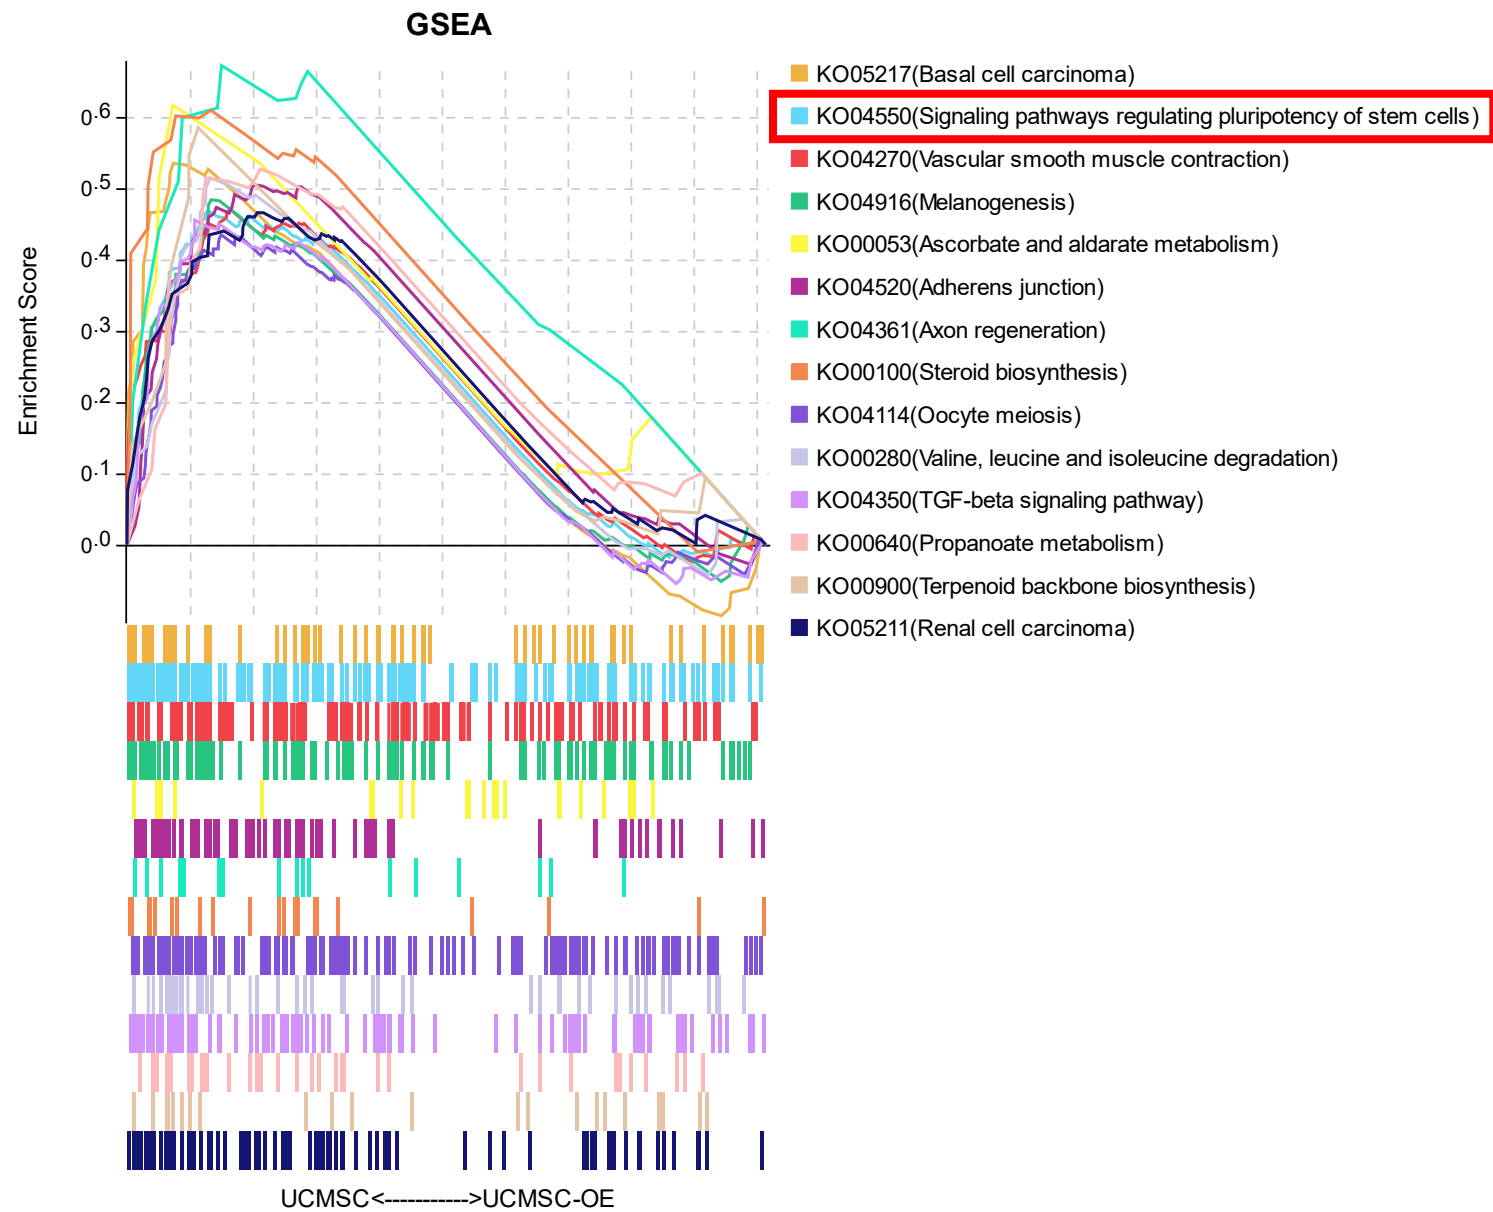

Figure S1. Top enriched KEGG pathway based on GSEA analysis

**Figure S1. Top enriched KEGG pathway based on GSEA analysis**

To explore the underlying mechanism, we performed RNA-seq and bioinformatics analysis, and found that SCRG1 promoted chondrogenic differentiation through the Wnt5a signaling pathway. Based on GSEA, we analyzed KEGG pathway enrichment. Results showed that the most significantly enriched pathway was related to “regulating pluripotency of stem cells” (KO 04550).

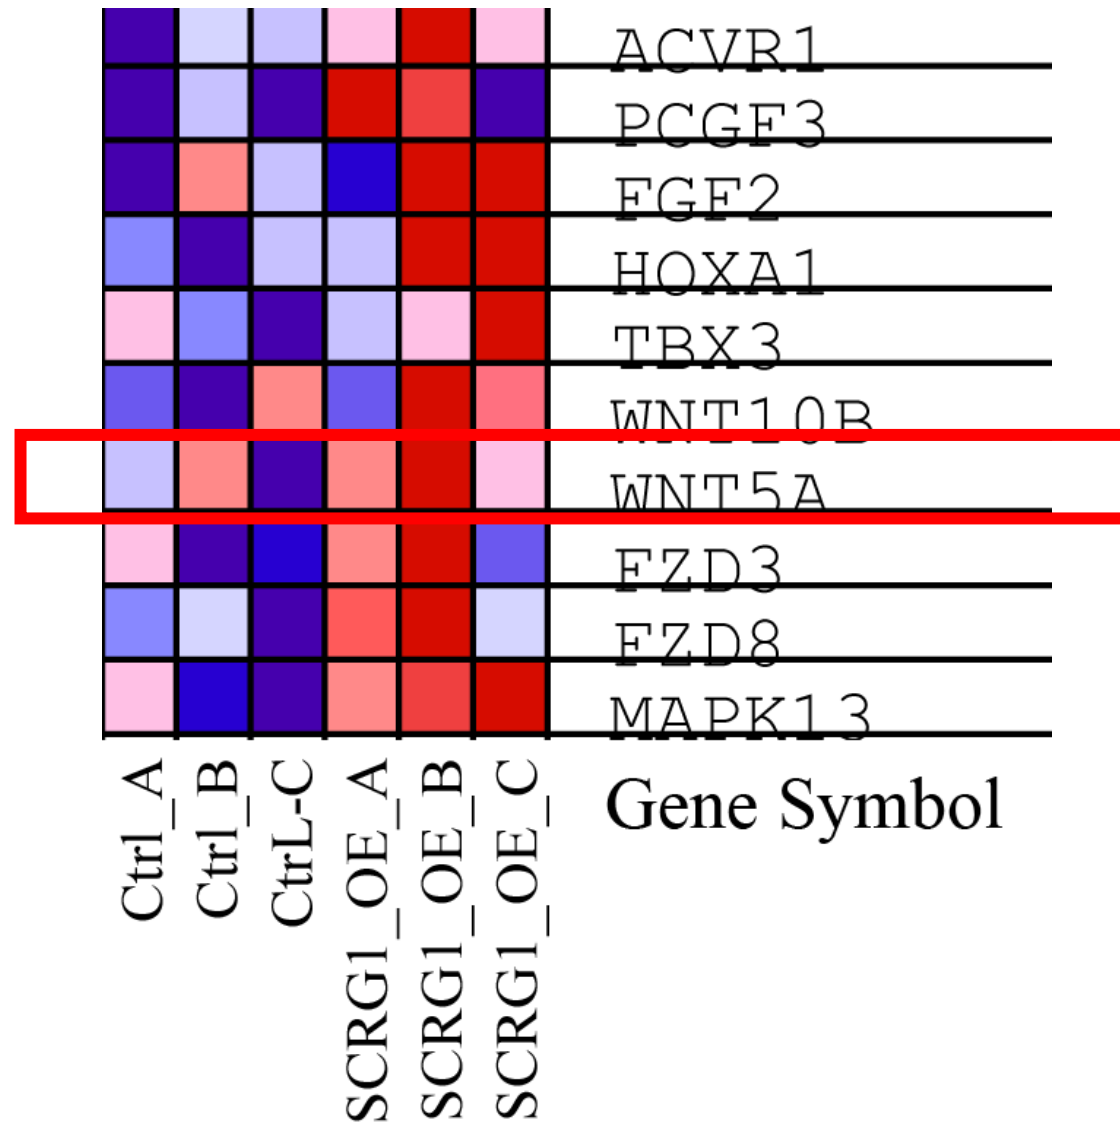

Figure S2. Top enriched genes in “regulating pluripotency of stem cells” pathway

**Figure S2. Top enriched genes in “regulating pluripotency of stem cells” pathway**

Wnt5a was top enriched genes and negatively correlated with this pathway after SCRG1 overexpression. These findings suggest that wnt5a is related to cell differentiation, and SCRG1 overexpression promotes chondrogenic differentiation of UCMSCs.

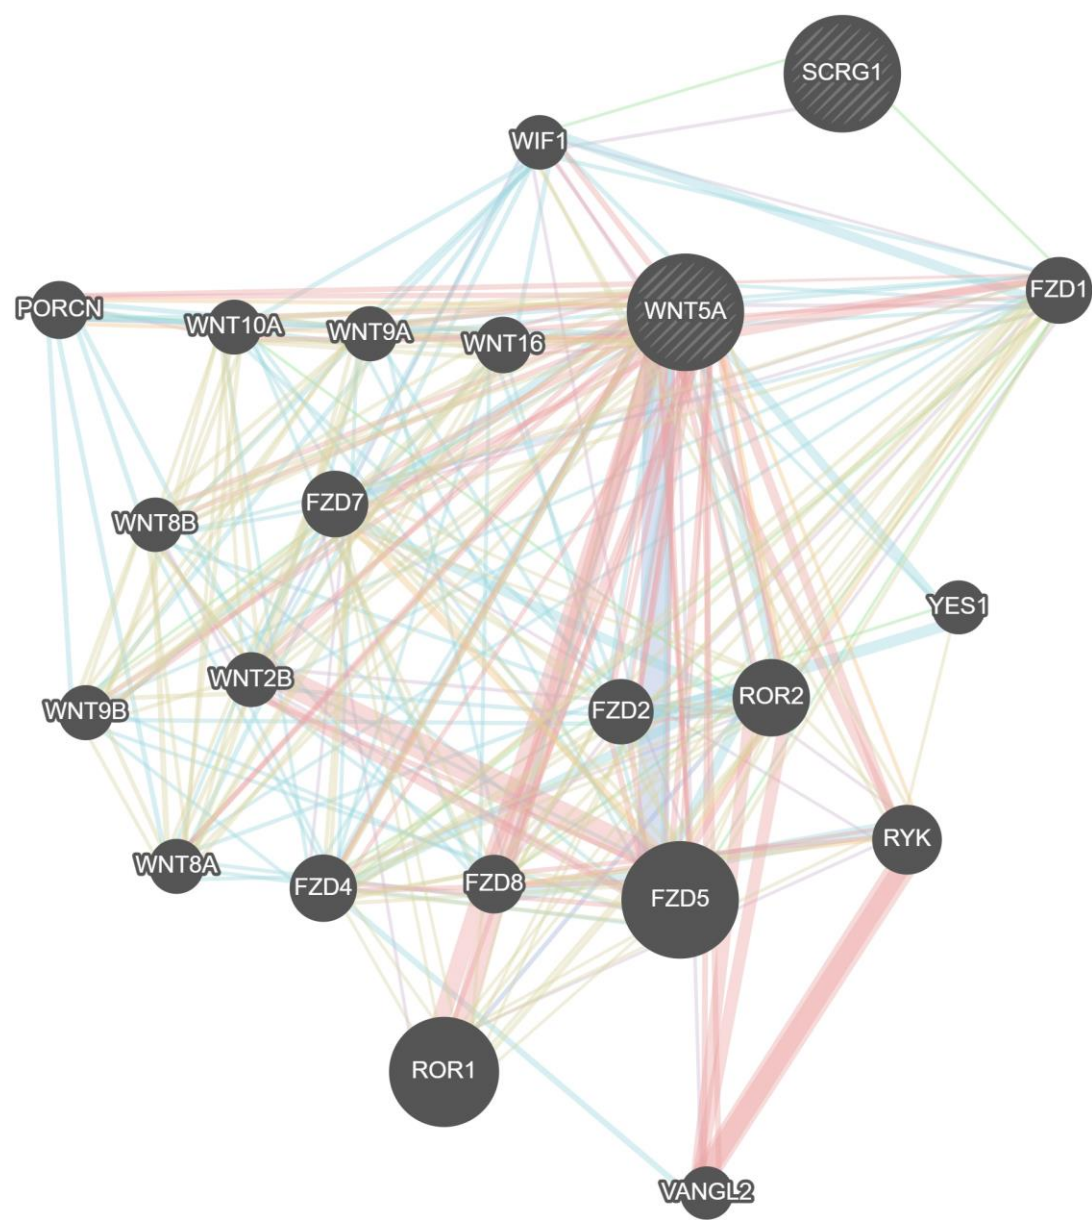

Figure S3: SCRG1 related molecular networks, analyzed by genemania

**Figure S3: SCRG1 related molecular networks, analyzed by genemania**

We performed protein-protein interaction (PPI) analysis using interactions from the GeneMANIA PPI database (<https://genemania.org/>) between enriched Wnt5a and SCRG1, and We found in previous study (Figure S3), SCRG1 and Wnt5a could indirectly connected through FZD1 and WIF1.

| Gene symbols |          |          |          |        |        |       |        |
|--------------|----------|----------|----------|--------|--------|-------|--------|
| MYH9         | VIM      | DSP      | HRNR     | PLEC   | MYH10  | ACTG1 | KPRP   |
| HSPA5        | P4HB     | DSG1     | LEPRE1   | MYL9   | ALB    | TPM1  | JUP    |
| MYO1C        | ANXA2    | GAPDH    | DCD      | FLG2   | MYL6   | ACTA2 | ACTG2  |
| DSC1         | FLG      | CRTAP    | AZGP1    | S100A7 | EEF1A1 | PKP1  | TUBA   |
| S100A9       | TRIM21   | PIP      | TXN      | ALDOA  | CALML5 | MYH14 | ACTB   |
| FABP5        | S100A8   | GGCT     | SERPINH1 | SBSN   | CLTC   | CAT   | FN1    |
| RPS18        | SERPINB3 | HIST1H4A | SPTBN1   | MS4A10 | XP32   | TUBB  | FANCE  |
| KIF18B       | RPL13    | NWD2     | SPRR2B   | ACT    | CASP14 | HSPA6 | MYL12B |
| ZNF840P      | FBXO3    | TLN2     |          |        |        |       |        |

Table S1: the protein list of Wnt5a antibody pulled down

**Table S1: the protein list of Wnt5a antibody pulled down**

To examine whether SCRG1 interacts with Wnt5a, we performed reverse co-immunoprecipitation (co-IP) experiments (as there is no commercial antibody against SCRG1 for western blot and co-IP analysis). Our results showed that SCRG1 did not directly connect with Wnt5a.
